# Supplementary material
Source: ML conference proceedings conference paper supplement (https://proceedings.mlr.press/v97/weng19a.html)
Supplement: Supplementary file [file weng19a-supp.pdf]

Table 4: **(Full table)** success rates with random attacks using Uniform noises and Bernoulli noises on 100 randomly chosen test images.

| Perturbed $\ell_\infty$ magnitude | $\epsilon = 0.30$ |           | $\epsilon = 0.25$ |           | $\epsilon = 0.20$ |           |
|-----------------------------------|-------------------|-----------|-------------------|-----------|-------------------|-----------|
| MNIST model                       | Uniform           | Bernoulli | Uniform           | Bernoulli | Uniform           | Bernoulli |
| MNIST 2-layer CNN, ReLU           | 25%               | 67%       | 25%               | 72%       | 15%               | 65%       |
| MNIST 2-layer CNN, tanh           | 35%               | 59%       | 91%               | 99%       | 83%               | 98%       |
| MNIST 2-layer CNN, sigmoid        | 83%               | 100%      | 92%               | 100%      | 15%               | 44%       |
| MNIST 2-layer CNN, arctan         | 18%               | 58%       | 7%                | 44%       | 22%               | 22%       |
| MNIST 3-layer CNN, ReLU           | 72%               | 89%       | 69%               | 90%       | 53%               | 99%       |
| MNIST 3-layer CNN, tanh           | 80%               | 90%       | 11%               | 25%       | 0%                | 41%       |
| MNIST 3-layer CNN, sigmoid        | 7%                | 31%       | 14%               | 24%       | 30%               | 76%       |
| MNIST 3-layer CNN, arctan         | 7%                | 79%       | 24%               | 83%       | 55%               | 73%       |
| MNIST 2-layer (robust)-CNN, ReLU  | 12%               | 35%       | 8%                | 20%       | 4%                | 14%       |
| MNIST 2-layer (robust)-CNN, tanh  | 16%               | 54%       | 14%               | 38%       | 10%               | 26%       |
| MNIST 3-layer (robust)-CNN, ReLU  | 9%                | 48%       | 6%                | 18%       | 6%                | 10%       |
| MNIST 3-layer (robust)-CNN, tanh  | 13%               | 27%       | 12%               | 21%       | 8%                | 15%       |
| MNIST LeNet No Pool, ReLU         | 11%               | 55%       | 6%                | 26%       | 4%                | 12%       |
| MNIST ResNet-3, ReLU              | 98%               | 98%       | 98%               | 98%       | 98%               | 100%      |

  

| Perturbed $\ell_\infty$ magnitude | $\epsilon = 0.030$ |           | $\epsilon = 0.025$ |           | $\epsilon = 0.020$ |           |
|-----------------------------------|--------------------|-----------|--------------------|-----------|--------------------|-----------|
| CIFAR model                       | Uniform            | Bernoulli | Uniform            | Bernoulli | Uniform            | Bernoulli |
| CIFAR $5 \times [2048]$ , ReLU    | 15%                | 18 %      | 15%                | 16%       | 13%                | 15%       |
| CIFAR $6 \times [2048]$ , ReLU    | 17%                | - %       | 17%                | 20%       | 14 %               | 20 %      |
| CIFAR 5-layer CNN, ReLU           | 23%                | 42 %      | 22 %               | 31%       | 17%                | 28%       |

Figure 1: We plot the improvement of the largest  $\epsilon$  certified by PROVEN with various confidence ( $\gamma_L = \{99.99, 75, 50, 25, 5\}\%$ ) over the largest  $\epsilon$  certified by worst-case robustness certification algorithms (Weng et al., 2018; Zhang et al., 2018). We consider both input perturbations being independent/correlated Gaussian random variables as in Case (ii) and independent random variables as in Case (i). The  $x$ -axis label in the figure:  $\gamma_L$ ;  $y$ -axis label: Certification improvement of PROVEN over  $\epsilon_{\text{worst-case}}$ . The models are 2-4 layers MNIST networks with 1024 nodes per layer and ReLU activations.

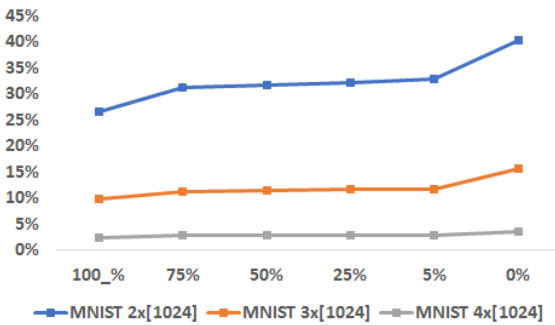

(a) Case (ii) Gaussian i.i.d.

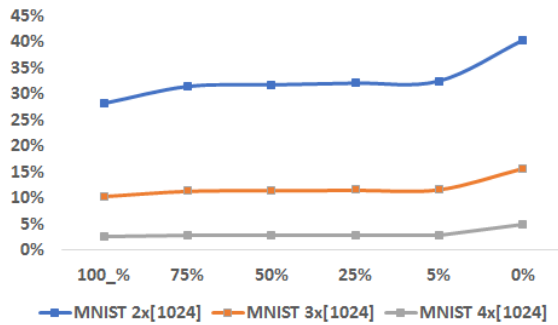

(b) Case (ii) Positive correlated Gaussian

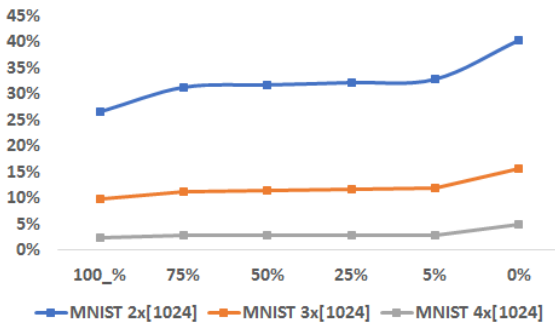

(c) Case (ii) General correlated Gaussian

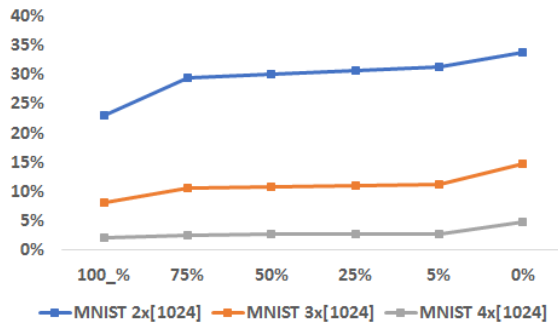

(d) Case (i) Bounded independent inputs

Table 5: The largest  $\epsilon$  that PROVEN can certify with confidence of at least  $\gamma_L = \{99.99, 75, 50, 25, 5\}\%$  when  $X_i$  are independent random variables in Case (i). We compare the largest  $\epsilon$  that PROVEN can certify with 99.99% with the largest  $\epsilon$  from state-of-the-art worst-case robustness certification algorithms Fast-Lin (Weng et al., 2018) and show in the last column that PROVEN can certify more than the worst-case analysis by giving up 0.01% confidence. The results comparing PROVEN with CROWN (Zhang et al., 2018) are shown in the main paper in Table 3a with additional ‘ada’ after network names.

(a) Relu activation

| Certification Method<br>Guarantees $\gamma_L$ | Worst-case (Fast-Lin)<br>100% <sup>†</sup> | Our probabilistic approach: PROVEN |         |         |         |         | Certification<br>improvement <sup>†</sup> |
|-----------------------------------------------|--------------------------------------------|------------------------------------|---------|---------|---------|---------|-------------------------------------------|
|                                               |                                            | 99.99% <sup>†</sup>                | 75%     | 50%     | 25%     | 5%      |                                           |
| MNIST 2×[20]                                  | 0.02722                                    | <b>0.04394</b>                     | 0.04782 | 0.04824 | 0.04859 | 0.04897 | <b>61.4%</b>                              |
| MNIST 3×[20]                                  | 0.02127                                    | <b>0.02694</b>                     | 0.02831 | 0.02847 | 0.02860 | 0.02874 | <b>26.7%</b>                              |
| MNIST 2×[1024]                                | 0.02904                                    | <b>0.03572</b>                     | 0.03758 | 0.03778 | 0.03796 | 0.03814 | <b>23.0%</b>                              |
| MNIST 3×[1024]                                | 0.02082                                    | <b>0.02253</b>                     | 0.02303 | 0.02309 | 0.02313 | 0.02318 | <b>8.2 %</b>                              |
| MNIST 4×[1024]                                | 0.00796                                    | <b>0.00813</b>                     | 0.00817 | 0.00818 | 0.00818 | 0.00818 | <b>2.1 %</b>                              |
| CIFAR 5×[2048]                                | 0.00183                                    | <b>0.00186</b>                     | 0.00186 | 0.00186 | 0.00186 | 0.00186 | <b>1.6 %</b>                              |
| CIFAR 7×[1024]                                | 0.00189                                    | <b>0.00192</b>                     | 0.00192 | 0.00193 | 0.00193 | 0.00193 | <b>1.6 %</b>                              |

Table 6: The largest  $\epsilon$  that PROVEN can certify with confidence of at least  $\gamma_L = \{99.99, 75, 50, 25, 5\}\%$  when  $X_i$  are independent random variables in Case (i). We compare the largest  $\epsilon$  that PROVEN can certify with 99.99% with the largest  $\epsilon$  from state-of-the-art worst-case certification algorithms Fast-Lin and CROWN (Weng et al., 2018; Zhang et al., 2018) and show in the last column that PROVEN can certify more than the worst-case analysis by giving up 0.01% confidence.

(a) Sub-Gaussian noises, bounds

| Certification Method<br>Guarantees $\gamma_L$ | Worst-case<br>100% <sup>†</sup> | Our probabilistic approach: PROVEN |         |         |         |         | Certification<br>Improvement <sup>†</sup> |
|-----------------------------------------------|---------------------------------|------------------------------------|---------|---------|---------|---------|-------------------------------------------|
|                                               |                                 | 99.99% <sup>†</sup>                | 75%     | 50%     | 25%     | 5%      |                                           |
| MNIST 2×[20], ReLU ada                        | 0.02746                         | <b>0.04912</b>                     | 0.05212 | 0.05246 | 0.05276 | 0.05307 | <b>78.9 %</b>                             |
| MNIST 3×[20], ReLU ada                        | 0.02236                         | <b>0.03828</b>                     | 0.03966 | 0.03981 | 0.03995 | 0.04009 | <b>71.2 %</b>                             |
| MNIST 3×[1024], ReLU ada                      | 0.03158                         | <b>0.05560</b>                     | 0.05756 | 0.05779 | 0.05798 | 0.05818 | <b>76.1 %</b>                             |
| MNIST 3×[1024], ReLU ada                      | 0.02397                         | <b>0.03524</b>                     | 0.03583 | 0.03589 | 0.03595 | 0.03601 | <b>47.1 %</b>                             |
| MNIST 4×[1024], ReLU ada                      | 0.00962                         | <b>0.01288</b>                     | 0.01293 | 0.01294 | 0.01295 | 0.01295 | <b>33.9 %</b>                             |
| CIFAR 5×[2048], ReLU ada                      | 0.00228                         | <b>0.00264</b>                     | 0.00265 | 0.00265 | 0.00265 | 0.00265 | <b>15.8 %</b>                             |
| CIFAR 7×[1024], ReLU ada                      | 0.00189                         | <b>0.00209</b>                     | 0.00210 | 0.00210 | 0.00210 | 0.00210 | <b>10.6 %</b>                             |
| MNIST 2×[1024], tanh                          | 0.02232                         | <b>0.02915</b>                     | 0.03005 | 0.03013 | 0.03022 | 0.03033 | <b>30.6%</b>                              |
| MNIST 3×[1024], tanh                          | 0.01121                         | <b>0.01360</b>                     | 0.01376 | 0.01378 | 0.01380 | 0.01381 | <b>21.3 %</b>                             |
| MNIST 4×[1024], tanh                          | 0.00682                         | <b>0.00745</b>                     | 0.00750 | 0.00750 | 0.00751 | 0.00751 | <b>9.2 %</b>                              |
| CIFAR 5×[2048], tanh                          | 0.00081                         | <b>0.00085</b>                     | 0.00085 | 0.00085 | 0.00085 | 0.00085 | <b>4.9 %</b>                              |
| MNIST 2×[1024], sigmoid                       | 0.02785                         | <b>0.03285</b>                     | 0.03404 | 0.03419 | 0.03426 | 0.03441 | <b>18.0%</b>                              |
| MNIST 3×[1024], sigmoid                       | 0.01856                         | <b>0.02296</b>                     | 0.02342 | 0.02348 | 0.02353 | 0.02358 | <b>23.7 %</b>                             |
| MNIST 4×[1024], sigmoid                       | 0.01778                         | <b>0.02170</b>                     | 0.02224 | 0.02229 | 0.02232 | 0.02237 | <b>22.1 %</b>                             |
| MNIST 2×[1024], arctan                        | 0.02105                         | <b>0.02796</b>                     | 0.02907 | 0.02915 | 0.02924 | 0.02936 | <b>32.8%</b>                              |
| MNIST 3×[1024], arctan                        | 0.01250                         | <b>0.01462</b>                     | 0.01486 | 0.01488 | 0.01490 | 0.01493 | <b>17.0 %</b>                             |
| MNIST 4×[1024], arctan                        | 0.00726                         | <b>0.00829</b>                     | 0.00836 | 0.00837 | 0.00838 | 0.00838 | <b>14.2 %</b>                             |
| MNIST 2-layer CNN, ReLU                       | 0.04565                         | <b>0.06367</b>                     | 0.06884 | 0.06989 | 0.07082 | 0.07181 | <b>1.4X</b>                               |
| MNIST 2-layer CNN, tanh                       | 0.0331                          | <b>0.09987</b>                     | 0.13538 | 0.1437  | 0.15135 | 0.15981 | <b>3.0X</b>                               |
| MNIST 2-layer CNN, sigmoid                    | 0.09242                         | <b>0.18777</b>                     | 0.2218  | 0.22906 | 0.23553 | 0.24243 | <b>2.0X</b>                               |
| MNIST 2-layer CNN, arctan                     | 0.03747                         | <b>0.13114</b>                     | 0.18872 | 0.20279 | 0.21577 | 0.23028 | <b>3.5X</b>                               |
| MNIST 3-layer CNN, ReLU                       | 0.04609                         | <b>0.06301</b>                     | 0.0674  | 0.06828 | 0.06904 | 0.06986 | <b>1.4X</b>                               |
| MNIST 3-layer CNN, tanh                       | 0.03348                         | <b>0.05917</b>                     | 0.06676 | 0.06828 | 0.06962 | 0.07108 | <b>1.8X</b>                               |
| MNIST 3-layer CNN, sigmoid                    | 0.07477                         | <b>0.13204</b>                     | 0.14844 | 0.15186 | 0.15471 | 0.15781 | <b>1.8X</b>                               |
| MNIST 3-layer CNN, arctan                     | 0.02868                         | <b>0.05514</b>                     | 0.06272 | 0.06425 | 0.06559 | 0.06702 | <b>1.9X</b>                               |
| MNIST ResNet-3, ReLU                          | 0.01751                         | <b>0.01827</b>                     | 0.01864 | 0.01869 | 0.01876 | 0.01881 | <b>1.0X</b>                               |
| CIFAR 5-layer CNN, ReLU                       | 0.00402                         | <b>0.00465</b>                     | 0.00471 | 0.00472 | 0.00473 | 0.00473 | <b>1.2X</b>                               |
| TinyImagenet, 7-layer CNN, ReLU               | 0.07245                         | <b>0.07367</b>                     | 0.07367 | 0.07368 | 0.07369 | 0.0737  | <b>1.0X</b>                               |
| MNIST 2-layer (robust)-CNN, ReLU              | 0.09304                         | <b>0.11424</b>                     | 0.12224 | 0.1238  | 0.12515 | 0.12658 | <b>1.2X</b>                               |
| MNIST 2-layer (robust)-CNN, tanh              | 0.12795                         | <b>0.37451</b>                     | 0.76167 | 0.90881 | 1.06778 | 1.2689  | <b>2.9X</b>                               |
| MNIST 3-layer (robust)-CNN, ReLU              | 0.10494                         | <b>0.11984</b>                     | 0.1253  | 0.12631 | 0.12717 | 0.12809 | <b>1.1X</b>                               |
| MNIST 3-layer (robust)-CNN, tanh              | 0.20596                         | <b>0.24122</b>                     | 0.27452 | 0.28091 | 0.28649 | 0.29239 | <b>1.2X</b>                               |

Table 7: **Subgaussian noises:** With input perturbations being independent random variables in case (i), we randomly choose  $\{10, 50, 100\}$  input samples (images) in each trial and then compute the average of the largest  $\epsilon$  that can be certified by worst-case framework CNN-Cert (Boopathy et al., 2019) (denoted as  $\epsilon_{\text{worst-case}}$ ) and by PROVEN with 99.99% confidence (denoted as  $\epsilon_{\text{PROVEN}}$ ) together with the improved certification of  $\epsilon_{\text{PROVEN}}$  over  $\epsilon_{\text{worst-case}}$  (denoted as Improv.). We present the mean and std of the average  $\epsilon$  and the improvements for  $\{10, 50, 100\}$  samples in a total of 100 random trials, showing that the mean and std converge as the number of samples increases.

| Models                             | bound | 10 samples                     |                            |         | 50 samples                     |                            |         | 100 samples                    |                            |         |
|------------------------------------|-------|--------------------------------|----------------------------|---------|--------------------------------|----------------------------|---------|--------------------------------|----------------------------|---------|
|                                    |       | $\epsilon_{\text{worst-case}}$ | $\epsilon_{\text{PROVEN}}$ | Improv. | $\epsilon_{\text{worst-case}}$ | $\epsilon_{\text{PROVEN}}$ | Improv. | $\epsilon_{\text{worst-case}}$ | $\epsilon_{\text{PROVEN}}$ | Improv. |
| MNIST $3 \times [1024]$ , ReLU,ada | Mean  | 0.02559                        | 0.03703                    | 44.75%  | 0.02581                        | 0.03734                    | 44.70%  | 0.02579                        | 0.03733                    | 44.74%  |
|                                    | std   | 0.00165                        | 0.00222                    | 1.12%   | 0.00076                        | 0.00102                    | 0.57%   | 0.00054                        | 0.00071                    | 0.43%   |
| MNIST $3 \times [1024]$ , tanh     | Mean  | 0.01195                        | 0.01375                    | 15.17%  | 0.01193                        | 0.01374                    | 15.22%  | 0.01192                        | 0.01374                    | 15.25%  |
|                                    | std   | 0.00065                        | 0.00068                    | 2.66%   | 0.00030                        | 0.00030                    | 1.27%   | 0.00020                        | 0.00021                    | 0.77%   |
| MNIST $4 \times [1024]$ , ReLU,ada | Mean  | 0.00998                        | 0.01329                    | 33.18%  | 0.00994                        | 0.01325                    | 33.24%  | 0.00997                        | 0.01328                    | 33.21%  |
|                                    | std   | 0.00051                        | 0.00066                    | 0.57%   | 0.00021                        | 0.00027                    | 0.27%   | 0.00014                        | 0.00018                    | 0.15%   |
| CIFAR $5 \times [2048]$ , ReLU,ada | Mean  | 0.00224                        | 0.00264                    | 18.07%  | 0.00222                        | 0.00262                    | 17.93%  | 0.00222                        | 0.00263                    | 18.06%  |
|                                    | std   | 0.00020                        | 0.00025                    | 2.39%   | 0.00009                        | 0.00011                    | 1.12%   | 0.00005                        | 0.00006                    | 0.55%   |
| CIFAR $5 \times [2048]$ , arctan   | Mean  | 0.00091                        | 0.00100                    | 9.28%   | 0.00091                        | 0.00100                    | 9.32%   | 0.00092                        | 0.00100                    | 9.32%   |
|                                    | std   | 0.00008                        | 0.00009                    | 3.17%   | 0.00003                        | 0.00003                    | 1.15%   | 0.00001                        | 0.00002                    | 0.56%   |
| CIFAR $7 \times [1024]$ , ReLU,ada | Mean  | 0.00176                        | 0.00195                    | 10.68%  | 0.00174                        | 0.00192                    | 10.73%  | 0.00174                        | 0.00193                    | 10.70%  |
|                                    | std   | 0.00018                        | 0.00020                    | 1.87%   | 0.00007                        | 0.00008                    | 0.75%   | 0.00003                        | 0.00004                    | 0.37%   |

Table 8: **Gaussian correlated noises:** compare PROVEN with worst-case certification CNN-Cert (Boopathy et al., 2019)

| Certification Method<br>Guarantees $\gamma_L$ | Worst-case<br>100% <sup>†</sup> | Our probabilistic approach: PROVEN |         |         |         |         | Certification<br>Improvement <sup>†</sup> |
|-----------------------------------------------|---------------------------------|------------------------------------|---------|---------|---------|---------|-------------------------------------------|
|                                               |                                 | 99.99% <sup>†</sup>                | 75%     | 50%     | 25%     | 5%      |                                           |
| MNIST 2-layer CNN, ReLU                       | 0.04565                         | <b>0.06975</b>                     | 0.07203 | 0.07256 | 0.0731  | 0.07388 | <b>1.5X</b>                               |
| MNIST 2-layer CNN, tanh                       | 0.0331                          | <b>0.14265</b>                     | 0.1617  | 0.16626 | 0.17091 | 0.17782 | <b>4.3X</b>                               |
| MNIST 2-layer CNN, sigmoid                    | 0.09242                         | <b>0.22809</b>                     | 0.24401 | 0.24769 | 0.25141 | 0.25684 | <b>2.5X</b>                               |
| MNIST 2-layer CNN, arctan                     | 0.03747                         | <b>0.20091</b>                     | 0.23355 | 0.24136 | 0.24946 | 0.2616  | <b>5.4X</b>                               |
| MNIST 3-layer CNN, ReLU                       | 0.04609                         | <b>0.06816</b>                     | 0.07004 | 0.07046 | 0.07089 | 0.07152 | <b>1.5X</b>                               |
| MNIST 3-layer CNN, tanh                       | 0.03348                         | <b>0.06809</b>                     | 0.0714  | 0.07216 | 0.07293 | 0.07405 | <b>2.0X</b>                               |
| MNIST 3-layer CNN, sigmoid                    | 0.07477                         | <b>0.15139</b>                     | 0.15852 | 0.16012 | 0.16171 | 0.16403 | <b>2.0X</b>                               |
| MNIST 3-layer CNN, arctan                     | 0.02868                         | <b>0.06406</b>                     | 0.06734 | 0.06811 | 0.06888 | 0.07    | <b>2.2X</b>                               |
| MNIST ResNet-3, ReLU                          | 0.01751                         | <b>0.01868</b>                     | 0.01883 | 0.01884 | 0.01887 | 0.0189  | <b>1.1X</b>                               |
| CIFAR 5-layer CNN, ReLU                       | 0.00402                         | <b>0.00465</b>                     | 0.00471 | 0.00472 | 0.00473 | 0.00473 | <b>1.2X</b>                               |
| Tiny Imagenet, 7-layer CNN, ReLU              | 0.07245                         | <b>0.07368</b>                     | 0.0737  | 0.07371 | 0.07372 | 0.07372 | <b>1.0X</b>                               |
| MNIST 2-layer (robust)-CNN, ReLU              | 0.09304                         | <b>0.12361</b>                     | 0.1269  | 0.12764 | 0.12838 | 0.12946 | <b>1.3X</b>                               |
| MNIST 2-layer (robust)-CNN, tanh              | 0.12795                         | <b>0.88968</b>                     | 1.3172  | 1.43648 | 1.56153 | 1.74872 | <b>7.0X</b>                               |
| MNIST 3-layer (robust)-CNN, ReLU              | 0.10494                         | <b>0.12618</b>                     | 0.12829 | 0.12875 | 0.12921 | 0.12989 | <b>1.2X</b>                               |
| MNIST 3-layer (robust)-CNN, tanh              | 0.20596                         | <b>0.28015</b>                     | 0.29364 | 0.29681 | 0.29994 | 0.30452 | <b>1.4X</b>                               |

Table 9: **Gaussian iid noises**: compare PROVEN with worst-case certification CNN-Cert (Boopathy et al., 2019)

| Certification Method<br>Guarantees $\gamma_L$ | Worst-case<br>100% <sup>†</sup> | Our probabilistic approach: PROVEN |         |         |         |         | Certification<br>Improvement <sup>†</sup> |
|-----------------------------------------------|---------------------------------|------------------------------------|---------|---------|---------|---------|-------------------------------------------|
|                                               |                                 | 99.99% <sup>†</sup>                | 75%     | 50%     | 25%     | 5%      |                                           |
| MNIST 2-layer CNN, ReLU                       | 0.04565                         | <b>0.06975</b>                     | 0.07204 | 0.07256 | 0.0731  | 0.07388 | <b>1.5X</b>                               |
| MNIST 2-layer CNN, tanh                       | 0.0331                          | <b>0.14261</b>                     | 0.16169 | 0.16626 | 0.1709  | 0.17781 | <b>4.3X</b>                               |
| MNIST 2-layer CNN, sigmoid                    | 0.09242                         | <b>0.22811</b>                     | 0.24399 | 0.24769 | 0.25141 | 0.25682 | <b>2.5X</b>                               |
| MNIST 2-layer CNN, arctan                     | 0.03747                         | <b>0.20094</b>                     | 0.23356 | 0.24136 | 0.24949 | 0.26153 | <b>5.4X</b>                               |
| MNIST 3-layer CNN, ReLU                       | 0.04609                         | <b>0.06816</b>                     | 0.07004 | 0.07046 | 0.07089 | 0.07152 | <b>1.5X</b>                               |
| MNIST 3-layer CNN, tanh                       | 0.03348                         | <b>0.06808</b>                     | 0.07139 | 0.07216 | 0.07292 | 0.07405 | <b>2.0X</b>                               |
| MNIST 3-layer CNN, sigmoid                    | 0.07477                         | <b>0.1514</b>                      | 0.15852 | 0.16012 | 0.16171 | 0.16403 | <b>2.0X</b>                               |
| MNIST 3-layer CNN, arctan                     | 0.02868                         | <b>0.06405</b>                     | 0.06734 | 0.06811 | 0.06888 | 0.07001 | <b>2.2X</b>                               |
| MNIST ResNet-3, ReLU                          | 0.01751                         | <b>0.01868</b>                     | 0.01883 | 0.01884 | 0.01887 | 0.0189  | <b>1.1X</b>                               |
| TinyImageNet, 7-layer CNN, ReLU               | 0.07245                         | <b>0.07368</b>                     | 0.0737  | 0.07371 | 0.07372 | 0.07372 | <b>1.0X</b>                               |
| MNIST 2-layer (robust)-CNN, ReLU              | 0.09304                         | <b>0.1236</b>                      | 0.1269  | 0.12764 | 0.12838 | 0.12946 | <b>1.3X</b>                               |
| MNIST 2-layer (robust)-CNN, tanh              | 0.12795                         | <b>0.88787</b>                     | 1.31724 | 1.43648 | 1.56164 | 1.74802 | <b>6.9X</b>                               |
| MNIST 3-layer (robust)-CNN, ReLU              | 0.10494                         | <b>0.12618</b>                     | 0.12829 | 0.12875 | 0.12921 | 0.12989 | <b>1.2X</b>                               |
| MNIST 3-layer (robust)-CNN, tanh              | 0.20596                         | <b>0.28014</b>                     | 0.29365 | 0.29681 | 0.29995 | 0.30454 | <b>1.4X</b>                               |
